# Supplementary material for: Evaluation of Reference Genes for Quantitative Real-Time PCR Analysis in the Bean Bug, Riptortus pedestris (Hemiptera: Alydidae)
Source: MDPI journal article supplement (doi:10.3390/insects14120960), 2023-12-18
Supplement: s1 [file s1]

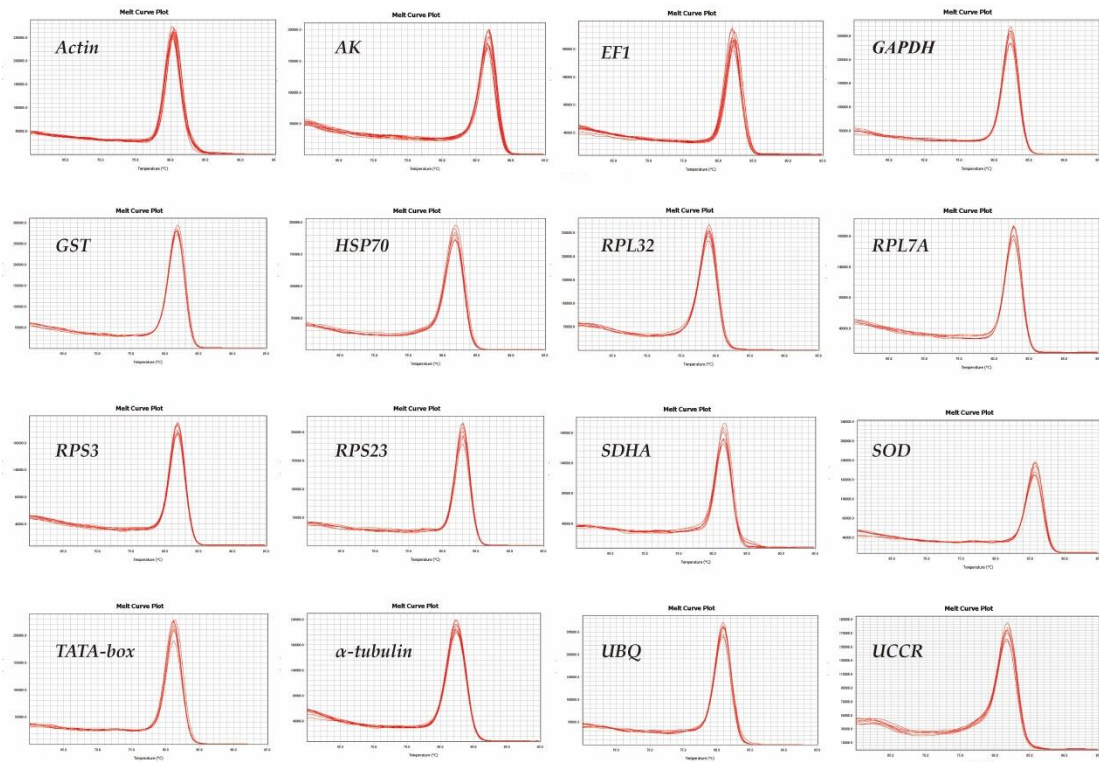

**Figure S1.** Melting curve analysis of twelve candidate reference genes.

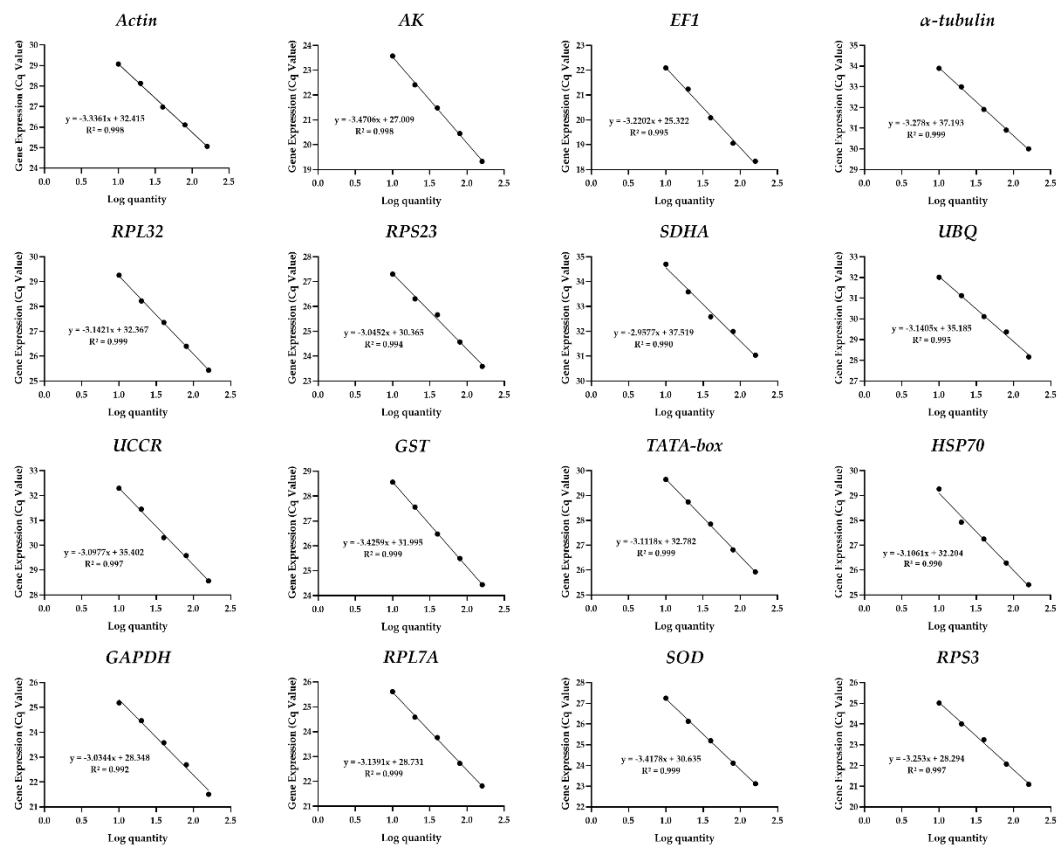

**Figure S2.** Standard curves of the twelve candidate reference genes.
